# Supplementary material for: Impact of Intrinsic Affinity on Functional Binding and Biological Activity of EGFR Antibodies
Source: Oxford University Press journal article supplement (doi:10.1158/1535-7163.mct-11-1038), 2012-05-08
Supplement: 15357163mct111038-sup-tab1.pdf [file 15357163mct111038-sup-tab1.pdf]

Supplementary Table 1. *Binding kinetics and affinities of IgG converted from affinity-matured scFv (2224 and P2/4) vs C225 as measured by KinExA.*

| Antibody | $k_{on}$ ( $\times 10^7 \text{ M}^{-1} \text{ s}^{-1}$ ) | $k_{off}$ ( $\times 10^{-3} \text{ s}^{-1}$ ) | $K_D$ ( $\times 10^{-9} \text{ M}^{-1}$ ) |
|----------|----------------------------------------------------------|-----------------------------------------------|-------------------------------------------|
| C225     | 1.00                                                     | 2.07                                          | 0.206                                     |
| 2224-IgG | 2.11                                                     | 34.7                                          | 1.77                                      |
| P2/4-IgG | >0.517                                                   | <283.1                                        | 54.8                                      |
